1 **Type of manuscript:** Original Research Article

2

3 **Per- and poly-fluoroalkyl substances and bone mineral density: results from the**

4 **Bayesian weighted quantile sum regression**

5 Elena Colicino\*<sup>1</sup>, Nicolo Foppa Pedretti<sup>1</sup>, Stefanie Busgang<sup>1</sup>, Chris Gennings<sup>1</sup>

6 <sup>1</sup> Department of Environmental Medicine and Public Health, Icahn School of Medicine at Mount  
7 Sinai, 17 E 102<sup>nd</sup> St, New York, 10029, NY, USA

8 \* Corresponding author: [elena.colicino@mssm.edu](mailto:elena.colicino@mssm.edu)

9 **Running title:** Per- and poly-fluoroalkyl substances and bone mineral density

10

11 **Conflict of interest:** None

12

13 **Financial support and acknowledgments:** This research was supported by grant  
14 P30ES023515, U2CES026444, UH3OD023337-03 of the National Institute of Environmental  
15 Health Sciences of the National Institutes of Health. The authors would like to thank Dr.  
16 Christine Schubert Kabban for helpful comments.

17

18 **Data and code sharing:** Data are available on the Centers for Disease Control and Prevention  
19 (CDC)'s website (National Health and Nutrition Examination Survey cycle 2013-2014). Code for  
20 the statistical method and toy examples is available in the "BWQS" R-package.

21

22 **Abstract**

23 **Background:** Per- and poly-fluoroalkyl substances (PFAS) are chemicals, detected in 95% of  
24 Americans, that induce osteotoxicity and modulate hormones thereby influencing bone health.  
25 Previous studies found associations between individual PFAS and bone mineral density but did  
26 not analyze their combined effects.

27 **Objective:** To extend weighted quantile sum (WQS) regression to a Bayesian framework  
28 (BWQS) and determine the association between a mixture of serum PFAS and mineral density  
29 in lumbar spine, total and neck femur in 499 adults from the 2013–2014 National Health and  
30 Nutrition Examination Survey (NHANES).

31 **Methods:** We used BWQS to assess the combined association of nine PFAS, as a mixture, with  
32 bone mineral density in adults. As secondary analyses, we focused on vulnerable populations  
33 (men over 50 years and postmenopausal women). Analyses were weighted according to  
34 NHANES weights and were adjusted for socio-demographic factors. Sensitivity analyses  
35 included bone mineral density associations with individual compounds and results from WQS  
36 regressions.

37 **Results:** The mean age was 55 years old (Standard Error [SE]=1) with average spine, total and  
38 neck femur mineral densities of 1.01 (SE=0.01), 0.95 (SE=0.01), and 0.78 (SE=0.01) gm/cm<sup>2</sup>,  
39 respectively. PFAS mixture levels showed no evidence of association with mineral density  
40 (spine:  $\beta=-0.004$ ; 95% credible interval [CrI]=-0.04, 0.04; total femur:  $\beta=0.002$ ; 95%CrI=-0.04,  
41 0.05; femur neck:  $\beta=0.005$ ; 95%CrI=-0.03, 0.04) in the overall population. Results were also null  
42 in vulnerable populations. Findings were consistent across sensitivity analyses.

43 **Conclusions:** We introduced a Bayesian extension of WQS and found no evidence of the  
44 association between PFAS mixture and bone mineral density.

45  
46 **Keywords:** Per- and poly-fluoroalkyl substances (PFAS), bone health, bone mineral density,  
47 mixture, Bayesian weighted quantile sum regression.

48  
49

## 50 Introduction

51 As the population ages, low bone mineral density has emerged as a public health concern  
52 because it is related to fractures, morbidities, hospitalizations, and premature mortality.<sup>1,2</sup>  
53 Deterioration of bone mass differs between the sexes, with a higher prevalence in women.  
54 About 10% of women over 50 years of age suffer from low bone mineral density, but only 2%  
55 of men of the same age have similar bone deterioration.<sup>3</sup> Traditional risk factors associated with  
56 decreased bone mineral density include chronological age, family history of bone disease,  
57 suboptimal high-impact physical activity, and smoking.<sup>4</sup> However, recent evidence suggests that  
58 environmental exposures, including air pollution, lead, cadmium, and mercury, are associated  
59 with lower bone mineral density and higher risks for osteoporosis.<sup>5-7</sup>

60

61 Per- and poly-fluoroalkyl substances (PFAS) are synthetic organic chemicals that have been  
62 used extensively in industrial processes and commercial applications since the 1950s. These  
63 chemicals are widely used and persist for long periods of time, resulting in increased levels of  
64 environmental contamination.<sup>8,9</sup> The primary sources of human PFAS exposure include  
65 migration from food packaging and cookware, drinking water, indoor air, and house dust.<sup>10</sup>  
66 PFAS have been detected *in vivo* in human tissue samples,<sup>11,12</sup> in 95% of the U.S.  
67 population.<sup>13</sup> PFAS are poorly metabolized and excreted slowly from the human body, with half-  
68 lives of 4–8 years.<sup>14</sup> Previous human and animal studies showed that PFAS bioaccumulate in  
69 bones, with perfluorooctanoate (PFOA) being predominant.<sup>15,16</sup> Due to their limited susceptibility  
70 to degradation and slow elimination by human bodies, human exposure to PFAS is of increasing  
71 concern.<sup>17,18</sup>

72

73 The toxicity of PFAS to bones has been reported in human and animal studies, with high PFAS  
74 concentrations associated with adverse skeletal outcomes, suggesting that bones are target  
75 tissues for PFAS toxicity.<sup>19</sup> PFAS are also endocrine-disrupting chemicals<sup>20</sup> based on their  
76 hormonal modulation.<sup>21</sup> PFAS have been suggested to impact bone density via sex  
77 hormones.<sup>22,23</sup> In rodents, exposure to PFAS was negatively associated with bone structure and  
78 biomechanical properties.<sup>24</sup> Bone cell cultures showed increased bone resorption activity at low,  
79 albeit environmentally relevant, PFAS concentrations in human bone marrow and peripheral  
80 blood-derived osteoclasts, through the effect of PFAS on the cytokine and clastokine profiles  
81 during cell differentiation.<sup>19</sup> In human studies, bone PFAS concentrations and relative bone  
82 volume have been correlated, but results are still inconclusive. In a few cross-sectional studies,  
83 serum levels of a few PFAS were negatively associated with bone mineral density only in

84 women,<sup>19,21</sup> but findings for most compounds are null in the general U.S. population.<sup>19,21</sup> In  
85 addition, all previous studies focused on the association between individual PFAS and bone  
86 health outcomes; however, given their ubiquity and persistence, exposure likely occurs to many  
87 PFAS simultaneously. Those studies failed to account for the correlation structure among PFAS  
88 or to consider PFAS exposure as a mixture.

89  
90 Environmental health studies have applied weighted quantile sum (WQS) regression to assess  
91 the mixture effect of multiple co-occurring factors and to identify the driving factors in the  
92 mixture. Briefly, the WQS regression summarizes the overall exposure to the mixture by  
93 estimating a single weighted index and accounts for the individual contribution of each  
94 component of the mixture by using weights.<sup>25,26</sup> WQS regression splits the dataset into two  
95 subsets, a training set (generally 40%) and a validation set (60%). In the first set, this approach  
96 estimates the weights using an ensemble step and estimates average weights across B  
97 bootstrap samples, and in the second subset it estimates the coefficient mapped to the mixture,  
98 conditionally to the estimated weights.<sup>25-27</sup> This regression also requires a priori selection of the  
99 directionality (positive or negative) of the coefficient associated with the mixture, and it  
100 conditions on the weights in the weighted index for testing for significance using the hold out  
101 validation set. As such, it does not provide diagnostics (confidence intervals, standard deviation,  
102 and p values) about the weights of the components of the mixture.<sup>25,26</sup>

103  
104 Here we proposed a novel Bayesian extension of the WQS regression (BWQS) to overcome its  
105 limitations and to illustrate the method for assessing the combined association of several forms  
106 of serum PFAS as a mixture with bone mineral density in 499 U.S. adults from the 2013–2014  
107 cycle of the National Health and Nutrition Examination Survey (NHANES).<sup>3,28</sup> We also stratified  
108 our analysis for two vulnerable populations, men over 50 years of age and postmenopausal  
109 women.

110

## 111 **Methods**

### 112 **Study population**

113 The NHANES is an ongoing survey of the noninstitutionalized U.S. adult population designed to  
114 assess their health and nutritional status.<sup>28</sup> After providing informed consent, participants visited  
115 a mobile examination center for standardized physical examination and collection of biological  
116 specimens, which were used to assess exposure to environmental chemicals. All study  
117 protocols were approved by the National Center for Health Statistics research ethics review

118 board <sup>3,28</sup>. In our analyses, we included the 2013–2014 NHANES cycle, in which both bone  
119 mineral density and serum PFAS concentrations were measured and had not been previously  
120 studied. The 2013–2014 cycle also included four (linear and branched) PFAS isomers that were  
121 not measured in any previous NHANES cycles. For both evaluations, the selection of NHANES  
122 participants was random and designed to maintain the original NHANES characteristics, as  
123 previously described.<sup>13,29</sup> We excluded NHANES participants with missing information about  
124 bone mineral measurements (N = 7060) or serum concentrations of PFAS (N = 1450) and those  
125 with missing information on covariates (smoking and physical activity) or with bilateral  
126 oophorectomy (N = 74). A total of 499 adults (≥40 years) was included in the main analysis.  
127 Secondary analyses were performed on 115 men over 50 years and 117 postmenopausal  
128 women. Postmenopausal women included women over 60 years old, women who had not had a  
129 menstrual period in the previous 12 months. We excluded from the analysis postmenopausal  
130 women using hormone replacement treatment or taking parathyroid medication (N=45), due to  
131 their influence on the endocrine system (**Figure 1**).

132

### 133 **Bone mineral density assessment**

134 Bone mineral density (g/cm<sup>2</sup>) was measured using dual X-ray absorptiometry (Hologic QDR  
135 4500A fan-beam densitometers; Hologic Inc., Bedford, MA, USA).<sup>3</sup> Antero-posterior lumbar  
136 spine mineral density was scanned, and mean density was computed for the first through fourth  
137 lumbar vertebrae. For the total and neck femur mineral density, the left hip was routinely  
138 scanned. If a left-hip replacement or metal objects in the left leg were reported, the right hip was  
139 scanned. Participants were excluded from the femur scan if they had bilateral hip fractures,  
140 bilateral hip replacements, or pins. Participants weighing > 300 lbs (136 kg) or pregnant women  
141 (defined by self-report or positive urine pregnancy test) were ineligible for the examination.  
142 Femur neck has been proposed as the reference skeletal site for defining osteoporosis in  
143 epidemiologic studies,<sup>30</sup> whereas the total femur had been used as a benchmark for  
144 osteoporosis in the national Healthy People program <sup>30</sup>. Each subject's scan was reviewed in  
145 the Department of Radiology, University of California, using standard radiologic techniques and  
146 NHANES protocols.<sup>3</sup>

147

### 148 **Serum PFAS measurements**

149 Analysis of 12 PFAS in serum was conducted at the National Center for Environmental Health in  
150 a random one-third subsample of nonfasting participants; the NHANES characteristic  
151 proportions were maintained.<sup>13,29</sup> Briefly, serum PFAS were measured using automated solid-

152 phase extraction coupled to isotope-dilution high-performance liquid chromatography– tandem  
153 mass spectrometry.<sup>13</sup> The complete list of PFAS with their acronyms is included in [Table S1](#). In  
154 our analyses, we excluded four PFAS because their concentrations were below the limit of  
155 detection for more than 60% of samples ([Table S1](#)). For the remaining PFAS, when  
156 concentrations were less than the limit of detection, a value equal to the limit of detection  
157 divided by the square root of two was used in the analyses.

158

## 159 **Statistical methods and analyses**

### 160 *The Bayesian WQS (BQWS) regression*

161 Let the values for the correlated mixture components C be scored into quantiles ( $q_{ji}$ ) for the j-th  
162 component ( $j = 1, \dots, C$ ) and the i-th ( $i = 1, \dots, N$ ) participant. We modeled the association between  
163 the overall mixture and the outcome  $y_i$  using a generalized linear model framework

$$164 \quad g(\mu_i) = \beta_0 + \beta_1 [\sum_{j=1}^C w_j q_{ji}] + \boldsymbol{\gamma} \mathbf{Z}$$

165 where  $\mu_i = E(y_i)$ ,  $\beta_0$  is the intercept, and  $\beta_1$  is the coefficient mapped to the weighted index  
166 ( $\sum_{j=1}^C w_j q_{ji}$ );  $g(\cdot)$  is link function; and  $\boldsymbol{\gamma}$  is a vector of K coefficients mapped to the matrix of K  
167 covariates  $\mathbf{Z}$ . Similar to WQS regression, we modeled the weight  $w_j$  for exposure to the j-th  
168 component as an arbitrary function, taking values between 0 and 1, and the sum of all mixture  
169 weights to be equal to 1.

170

171 The BWQS required specification of the link function, similar to the frequentist approach, and  
172 prior probability distributions on all parameters, which differs from WQS regression. The general  
173 assumption for each parameter was a weak or uninformative prior. However, more informative  
174 priors can be chosen when prior information is known. The link function assumed the following  
175 forms:

176 a) logit link function:  $y_i \sim \text{binomial}(1, \mu_i)$ , when Y was binary;

177 b) identity link function:  $y_i \sim \text{Normal}(\mu_i, \sigma^2)$ , with a noninformative prior for

178  $\sigma^2 \sim \text{IGamma}(0.1, 0.1)$ , when Y was continuous.

179 Priors for the coefficients were uninformative or weakly informative and were summarized by  
180 normal distributions with large variance [ $\beta_0, \beta_1 \sim \text{Normal}(0, 100)$ ;  $\boldsymbol{\gamma}_k \sim \text{Normal}(0, 100)$ ] for each  $k =$   
181  $1, \dots, K$ . Priors for the weights were modelled as a unit-simplex in order to have non-negative  
182 weights ( $w_j \in (0, 1)$ ) and to sum all weights to one ( $\sum w_j = 1$ ). The natural choice was the Dirichlet  
183 distribution with the same density on each vertex for each component of the mixture; i.e.,  $\mathbf{w} =$   
184  $(w_1, \dots, w_C) \sim \text{Dirichlet}(\boldsymbol{\alpha} = (\alpha_1, \dots, \alpha_C))$ . The  $\boldsymbol{\alpha}$  parameter can be selected a priori equal to  $\mathbf{1}$ , when  
185 investigating the entire domain of the distribution uniformly. Results on simulated datasets,

186 showing the accuracy of the estimates of BWQS, are included in the supplemental material  
187 (Figures S3-S5).

188

### 189 *Statistical Analysis*

190 We estimated the correlations among PFAS and then performed BWQS regression in which  
191 bone mineral density (continuous)—in lumbar spine, total femur, and femur neck—was  
192 associated with mixtures of PFAS. All analyses were adjusted for race/ethnicity (white, black,  
193 Hispanic and other races), age (continuous), sex, physical activity (low-moderate or high),  
194 poverty-income ratio (continuous), and smoking status (never or ever smoked). All variables  
195 were selected based on previous association with the outcome.<sup>6,7,22</sup> Priors for all coefficients  
196 were uninformative: Normal(0,100). Secondary analyses focused on two vulnerable  
197 populations—men over 50 years old and postmenopausal women.

198

199 As sensitivity analyses, we assessed the associations between the PFAS mixture and mineral  
200 density in lumbar spine, total femur, and femur neck by using the frequentist WQS regression,  
201 for the overall population. We also used Bayesian linear regression to determine the association  
202 of each PFAS compound with bone mineral density in the overall population. We used R version  
203 3.5.1 for all analyses. All analyses were weighted according to the NHANES weights,  
204 appropriately rescaled for the selected subsample, as described on the Centers for Disease  
205 Control and Prevention website and in previous studies.<sup>31,32</sup>

206

## 207 **Results**

### 208 *Study Population Characteristics*

209 Adults included in our main analysis were 55 years old on average (standard error (SE): 0.6),  
210 mostly Caucasian (49%), never smoked (60%), reported physical activity below the optimal level  
211 (66%), and had an average poverty-income ratio of 2.9 (standard error (SE): 0.9) (Table 1). On  
212 average, spine and (total and neck) femur mineral densities were 1.01 (SE: 0.01), 0.95  
213 (SE:0.01), and 0.78 (SE:0.01) g/cm<sup>2</sup>, respectively, in the adult population. Bone mineral density  
214 was different by sex, with postmenopausal women having lower density (p<0.05). In all groups,  
215 serum concentrations of the linear and branched PFAS isomers (NPFOS, NPFOA, and  
216 MPFOS) were higher than all other PFAS levels (PFHS, PFNA, PFDE, MPAH, and PFUA)  
217 (Table 1). All serum PFAS concentrations were positively correlated with each other and  
218 showed similar patterns across populations (Figure 2).

219



220 *BWQS regression characteristics*

221 We employed BWQS regression to identify the association between the mixture of PFAS in  
222 subjects' serum and bone mineral density in spine, total and neck femur, in all adults together  
223 and in the most vulnerable populations separately.

224  
225 PFAS concentrations were categorized into quartiles, and we set the main parameters of the  
226 Hamiltonian Monte Carlo chain to optimize the accuracy and speed of the models. In total, we  
227 set 1000 iterations, of which 500 were burn-in and 3 were thinned. All parameters showed no  
228 autocorrelation between subsequent iterations, and the potential scale-reduction statistics,  
229 which were approximately equal to 1 for all estimated parameters, showed convergence of the  
230 chain to the equilibrium distributions ([Table S2](#)).

231  
232 *Results in the overall adult population*

233 In the overall adult population there was no evidence of association between the PFAS mixture  
234 and bone mineral density in lumbar spine ( $\beta = -0.004$ , 95% credible interval [CrI]: -0.04, 0.04)  
235 g/cm<sup>2</sup>, total femur ( $\beta = 0.002$ , 95% CrI: -0.04, 0.05) g/cm<sup>2</sup>, or femur neck ( $\beta = 0.005$ , 95% CrI: -  
236 0.03, 0.04) g/cm<sup>2</sup>. Components of the mixture contributed approximately equally to the mixture  
237 in the outcomes for the overall population ([Figures 3A, 4A, and 5A; Table S2](#)).

238  
239 *Sensitivity analyses in the overall adult population*

240 Results from sensitivity analyses using the frequentist WQS approach, assuming a negative  
241 direction between PFAS mixture and bone mineral density, were similar to those of BWQS. We  
242 found no associations between the PFAS mixture and all outcomes (lumbar spine:  $\beta = -0.01$ ,  $p =$   
243  $0.69$ ; total femur:  $\beta = -0.01$ ,  $p = 0.51$ ; femur neck  $\beta = -0.004$ ,  $p = 0.82$ ) using the validation hold  
244 out set of 70% ([Figure S1, Table S3](#)). Individual PFAS analyses showed a weak negative  
245 association among MPFOS and all bones (lumbar spine: -0.02, 95% CrI: -0.03, -0.009; total  
246 femur: -0.01, 95% CrI: -0.02, -0.003; and femur neck -0.01, 95% CrI: -0.02, -0.004), whereas  
247 PFNA was positively associated with total femur (0.04, 95% CrI: 0.01, 0.06) and neck femur  
248 (0.03, 95% CrI: 0.01, 0.05) ([Figure S2, Table S4](#)). However, those associations did not persist  
249 after correcting for multiple comparisons (data not shown).

250  
251 *Results in men over 50 years old and in postmenopausal women*

252 There was no evidence of an association between the PFAS mixture and bone mineral densities  
253 in men over 50 years old (lumbar spine:  $\beta = 0.01$ , 95% CrI: -0.05; 0.08; total femur  $\beta = 0.01$ , 95%



254 CrI: -0.04, 0.07; and femur neck  $\beta = 0.02$ , 95% CrI: -0.04, 0.07) or in postmenopausal women  
255 (lumbar spine  $\beta = 0.00$ , 95% CrI: -0.08, 0.08; total femur  $\beta = 0.02$ , 95% CrI: -0.04, 0.08; and  
256 femur neck  $\beta = 0.02$ , 95% CrI: -0.03, 0.08). The contribution of all mixture components was  
257 similar across bones and across populations (Figures 3-5 panels B and C; Table S2).

258

## 259 Discussion

260 We extended the WQS regression under a Bayesian framework and determined the combined  
261 association of eight PFAS with bone mineral density in lumbar spine and total and neck femur in  
262 a survey representative U.S. adult population in the years 2013–2014. The main BWQS  
263 characteristics include diagnostic statistics for all estimated parameters, and BWQS does not  
264 require a priori selection of the directionality of the coefficient associated with the mixture or  
265 splitting the original dataset, thus overcoming a few limitations of the frequentist approach.

266

267 The application of our novel method showed no evidence of the association between serum  
268 concentration of PFAS mixture, composed of linear and branched PFOS and PFOA isomers  
269 (NPFOS, NPFOA, and MPFOS) and PFHS, PFNA, PFDE, MPAH, and PFUA, and bone mineral  
270 density in lumbar spine and total and neck femur. The contribution of each compound was  
271 similar across bones. Results were also consistent using the frequentist WQS approach and  
272 Bayesian linear regressions.

273

274 Our results confirmed prior findings showing null associations between PFAS exposure and  
275 bone health in the overall adult U.S. population. Serum concentrations of individual PFAS,  
276 namely, PFOA, PFOS, PFHS, and PFNA, were not associated with mineral density in spine  
277 and total and neck femur in the overall adult population in the 2009–2010 NHANES cycle.<sup>22</sup>  
278 Previous findings showed that associations between a few individual PFAS compounds and  
279 bone mineral density were negative and significant in women only, with higher concentrations of  
280 PFOA, PFOS, PFHS, and PFNA associated with lower bone mineral density and with a higher  
281 risk osteoporosis in women.<sup>22</sup> However, those analyses ignored the correlations among those  
282 compounds and did not consider PFAS as a mixture, thereby increasing the number of false  
283 positives among significant results.

284

285 Epidemiological studies support the hypothesis that PFAS are endocrine disruptors. PFAS  
286 modulate thyroid and sex hormone concentrations, which play a critical role in bone remodeling  
287 and health<sup>33</sup>. Chronic PFAS exposure was associated with suppressed serum thyroxine and

288 triiodothyronine (T3) levels in human studies<sup>34,35</sup> and with altered responses to T3 in a T3-  
289 dependent cell line *in vitro*.<sup>36</sup> A cross-sectional study of adult NHANES participants<sup>35</sup> reported  
290 that serum PFHS was positively associated with subclinical hyperthyroidism in women, which is  
291 a risk factor for decreased bone mass.<sup>37</sup> PFAS also interfere directly with estrogen and  
292 androgen receptors, disrupting the biological effects of sex hormones and leading to reduced  
293 fecundity in women and delayed puberty in boys, both of which are associated with lower bone  
294 mineral density later in life.<sup>23,38</sup> In studies of women's health, PFAS were associated with  
295 decreased production of estradiol and progesterone, which are essential hormones for bone  
296 health due to their promotion of osteoblast activity. Based on this body of literature, the PFAS  
297 mixture, mediated by endocrine receptors, might affect bone mineral density, but further studies  
298 with longitudinal design are required to address this problem.

299  
300 We also found no evidence of an association between the PFAS mixture and bone mineral  
301 density in vulnerable populations, including men over 50 years old and postmenopausal women.  
302 However, our results could have been limited by a small number of participants (n = 115 and  
303 117, respectively). Also, men and women in this study were not asked whether they attempted  
304 to prevent bone deterioration by changes in lifestyle, such as using supplements or alternative  
305 treatments or eating a healthier diet.

306  
307 PFOA and PFOS, both of which were previously associated with bone mineral density in women  
308<sup>19,22</sup> were analyzed and decomposed in linear and branched isomers in our analyses, and we  
309 could not confirm previous results for those compounds. Due to the cross-sectional design of  
310 our study, we could not rule out whether it was reverse causation and PFAS exposure preceded  
311 the outcomes or bone mineral status affected the response to exposure<sup>39</sup>. It is also possible  
312 that our results may have been limited by the smaller number of participants (n=499) than other  
313 study showing an association between the exposure of a few PFAS and bone mineral density  
314 (n=1914).<sup>22</sup> Further studies with longitudinal design and larger sample size could help to  
315 disentangle the underlying mechanism linking PFAS exposure and bone health in older adults.

316  
317 The strengths of our study include a novel statistical approach, which accounted for the  
318 correlation among co-occurring PFAS and provided information about the overall adverse  
319 associations of PFAS and bone density. We used a sample that is known to represent the U.S.  
320 population in the years 2013–2014, and we relied on PFAS concentrations and bone mineral  
321 density levels that were validated and compared across NHANES cycles.

322

323 **Conclusions.** This is the first study to assess the relationship between exposure to a mixture of  
324 PFAS and bone mineral density at three bone sites. The novel Bayesian WQS approach  
325 identified both the overall association between PFAS mixture with bone mineral density and the  
326 contribution of each PFAS to the mixture. The serum PFAS mixture showed no association with  
327 mineral density of the lumbar spine and total and neck femur in the NHANES adult population in  
328 the years 2013–2014.

## 329 REFERENCES

- 330 1 Johnell, O., Kanis, J. & Gullberg, G. Mortality, morbidity, and assessment of fracture risk in male  
331 osteoporosis. *Calcified tissue international* **69**, 182-184 (2001).
- 332 2 Browner, W. S., Lui, L.-Y. & Cummings, S. R. Associations of Serum Osteoprotegerin Levels with  
333 Diabetes, Stroke, Bone Density, Fractures, and Mortality in Elderly Women<sup>1</sup>. *The Journal of*  
334 *Clinical Endocrinology & Metabolism* **86**, 631-637, doi:10.1210/jcem.86.2.7192 (2001).
- 335 3 Looker, A. C., Melton, L. J., 3rd, Harris, T. B., Borrud, L. G. & Shepherd, J. A. Prevalence and  
336 trends in low femur bone density among older US adults: NHANES 2005-2006 compared with  
337 NHANES III. *Journal of bone and mineral research : the official journal of the American Society for*  
338 *Bone and Mineral Research* **25**, 64-71, doi:10.1359/jbmr.090706 (2010).
- 339 4 Weaver, C. M. *et al.* The National Osteoporosis Foundation's position statement on peak bone  
340 mass development and lifestyle factors: a systematic review and implementation  
341 recommendations. *Osteoporos Int* **27**, 1281-1386, doi:10.1007/s00198-015-3440-3 (2016).
- 342 5 Engstrom, A. *et al.* Long-term cadmium exposure and the association with bone mineral density  
343 and fractures in a population-based study among women. *Journal of bone and mineral research : the official journal of the American Society for Bone and Mineral Research* **26**, 486-495, doi:10.1002/jbmr.224 (2011).
- 344  
345
- 346 6 Khalil, N. *et al.* Relationship of blood lead levels to incident nonspine fractures and falls in older  
347 women: the study of osteoporotic fractures. *Journal of bone and mineral research : the official*  
348 *journal of the American Society for Bone and Mineral Research* **23**, 1417-1425,  
349 doi:10.1359/jbmr.080404 (2008).
- 350 7 Pollack, A. Z. *et al.* Bone mineral density and blood metals in premenopausal women.  
351 *Environmental research* **120**, 76-81, doi:10.1016/j.envres.2012.06.001 (2013).
- 352 8 Prevedouros, K., Cousins, I. T., Buck, R. C. & Korzeniowski, S. H. Sources, fate and transport of  
353 perfluorocarboxylates. *Environmental science & technology* **40**, 32-44 (2006).
- 354 9 Lindstrom, A. B., Strynar, M. J. & Libelo, E. L. Polyfluorinated compounds: past, present, and  
355 future. *Environmental science & technology* **45**, 7954-7961, doi:10.1021/es2011622 (2011).
- 356 10 Miralles-Marco, A. & Harrad, S. Perfluorooctane sulfonate: a review of human exposure,  
357 biomonitoring and the environmental forensics utility of its chirality and isomer distribution.  
358 *Environment international* **77**, 148-159, doi:10.1016/j.envint.2015.02.002 (2015).
- 359 11 De Silva, A. O. & Mabury, S. A. Isomer distribution of perfluorocarboxylates in human blood:  
360 potential correlation to source. *Environmental science & technology* **40**, 2903-2909 (2006).
- 361 12 Llorca, M. *et al.* Analysis of perfluoroalkyl substances in cord blood by turbulent flow  
362 chromatography coupled to tandem mass spectrometry. *The Science of the total environment*  
363 **433**, 151-160, doi:10.1016/j.scitotenv.2012.05.080 (2012).
- 364 13 Calafat, A. M., Wong, L. Y., Kuklenyik, Z., Reidy, J. A. & Needham, L. L. Polyfluoroalkyl chemicals  
365 in the U.S. population: data from the National Health and Nutrition Examination Survey  
366 (NHANES) 2003-2004 and comparisons with NHANES 1999-2000. *Environ Health Perspect* **115**,  
367 1596-1602, doi:10.1289/ehp.10598 (2007).
- 368 14 Kato, K., Wong, L. Y., Jia, L. T., Kuklenyik, Z. & Calafat, A. M. Trends in exposure to polyfluoroalkyl  
369 chemicals in the U.S. Population: 1999-2008. *Environmental science & technology* **45**, 8037-  
370 8045, doi:10.1021/es1043613 (2011).
- 371 15 Perez, F. *et al.* Accumulation of perfluoroalkyl substances in human tissues. *Environment*  
372 *international* **59**, 354-362, doi:10.1016/j.envint.2013.06.004 (2013).
- 373 16 Bogdanska, J. *et al.* Tissue distribution of (3)(5)S-labelled perfluorooctane sulfonate in adult mice  
374 after oral exposure to a low environmentally relevant dose or a high experimental dose.  
375 *Toxicology* **284**, 54-62, doi:10.1016/j.tox.2011.03.014 (2011).

- 376 17 Butenhoff, J. L. *et al.* Characterization of risk for general population exposure to  
377 perfluorooctanoate. *Regulatory toxicology and pharmacology : RTP* **39**, 363-380,  
378 doi:10.1016/j.yrtph.2004.03.003 (2004).
- 379 18 Kennedy, G. L., Jr. *et al.* The toxicology of perfluorooctanoate. *Critical reviews in toxicology* **34**,  
380 351-384 (2004).
- 381 19 Koskela, A. *et al.* Perfluoroalkyl substances in human bone: concentrations in bones and effects  
382 on bone cell differentiation. *Sci Rep* **7**, 6841, doi:10.1038/s41598-017-07359-6 (2017).
- 383 20 White, S. S., Fenton, S. E. & Hines, E. P. Endocrine disrupting properties of perfluorooctanoic  
384 acid. *The Journal of steroid biochemistry and molecular biology* **127**, 16-26,  
385 doi:10.1016/j.jsbmb.2011.03.011 (2011).
- 386 21 Lin, L. Y., Wen, L. L., Su, T. C., Chen, P. C. & Lin, C. Y. Negative association between serum  
387 perfluorooctane sulfate concentration and bone mineral density in US premenopausal women:  
388 NHANES, 2005-2008. *The Journal of clinical endocrinology and metabolism* **99**, 2173-2180,  
389 doi:10.1210/jc.2013-3409 (2014).
- 390 22 Khalil, N. *et al.* Association of Perfluoroalkyl Substances, Bone Mineral Density, and Osteoporosis  
391 in the U.S. Population in NHANES 2009-2010. *Environmental health perspectives* **124**, 81-87,  
392 doi:10.1289/ehp.1307909 (2016).
- 393 23 Ernst, A. *et al.* Exposure to Perfluoroalkyl Substances during Fetal Life and Pubertal  
394 Development in Boys and Girls from the Danish National Birth Cohort. *Environ Health Perspect*  
395 **127**, 17004, doi:10.1289/ehp3567 (2019).
- 396 24 Thibodeaux, J. R. *et al.* Exposure to perfluorooctane sulfonate during pregnancy in rat and  
397 mouse. I: maternal and prenatal evaluations. *Toxicological sciences : an official journal of the*  
398 *Society of Toxicology* **74**, 369-381, doi:10.1093/toxsci/kfg121 (2003).
- 399 25 Czarnota, J., Gennings, C. & Wheeler, D. C. Assessment of weighted quantile sum regression for  
400 modeling chemical mixtures and cancer risk. *Cancer informatics* **14**, 159-171,  
401 doi:10.4137/cin.s17295 (2015).
- 402 26 Carrico, C., Gennings, C., Wheeler, D. C. & Factor-Litvak, P. Characterization of Weighted  
403 Quantile Sum Regression for Highly Correlated Data in a Risk Analysis Setting. *Journal of*  
404 *Agricultural, Biological, and Environmental Statistics* **20**, 100-120, doi:10.1007/s13253-014-  
405 0180-3 (2015).
- 406 27 Bellavia, A., James-Todd, T. & Williams, P. L. Approaches for incorporating environmental  
407 mixtures as mediators in mediation analysis. *Environment international* **123**, 368-374,  
408 doi:10.1016/j.envint.2018.12.024 (2019).
- 409 28 Centers for Disease Control and Prevention, N. C. f. H. S. N. C. f. H. S. National Health and  
410 Nutrition Examination Survey. Laboratory Procedure Manual: Creatinine. . (Hyattsville, MD: US  
411 Department of Health and Human Services, Centers for Disease Control and Prevention 2015–  
412 2016. ).
- 413 29 Archer, E., Hand, G. A. & Blair, S. N. Validity of U.S. Nutritional Surveillance: National Health and  
414 Nutrition Examination Survey Caloric Energy Intake Data, 1971–2010. *PLoS One* **8**, e76632,  
415 doi:10.1371/journal.pone.0076632 (2013).
- 416 30 Kanis, J. A. *et al.* A reference standard for the description of osteoporosis. *Bone* **42**, 467-475,  
417 doi:10.1016/j.bone.2007.11.001 (2008).
- 418 31 Centers for Disease Control and Prevention, N. C. f. H. S. N. C. f. H. S.
- 419 32 Malin, A. J. *et al.* Fluoride exposure and kidney and liver function among adolescents in the  
420 United States: NHANES, 2013-2016. *Environment international*, 105012,  
421 doi:10.1016/j.envint.2019.105012 (2019).
- 422 33 Lee, J. S. *et al.* Subclinical thyroid dysfunction and incident hip fracture in older adults. *Archives*  
423 *of internal medicine* **170**, 1876-1883, doi:10.1001/archinternmed.2010.424 (2010).

- 424 34 Knox, S. S., Jackson, T., Frisbee, S. J., Javins, B. & Ducatman, A. M. Perfluorocarbon exposure,  
425 gender and thyroid function in the C8 Health Project. *The Journal of toxicological sciences* **36**,  
426 403-410 (2011).
- 427 35 Wen, L. L., Lin, L. Y., Su, T. C., Chen, P. C. & Lin, C. Y. Association between serum perfluorinated  
428 chemicals and thyroid function in U.S. adults: the National Health and Nutrition Examination  
429 Survey 2007-2010. *The Journal of clinical endocrinology and metabolism* **98**, E1456-1464,  
430 doi:10.1210/jc.2013-1282 (2013).
- 431 36 Long, M., Ghisari, M. & Bonefeld-Jorgensen, E. C. Effects of perfluoroalkyl acids on the function  
432 of the thyroid hormone and the aryl hydrocarbon receptor. *Environmental science and pollution  
433 research international* **20**, 8045-8056, doi:10.1007/s11356-013-1628-7 (2013).
- 434 37 El Hadidy el, H. M., Ghonaim, M., El Gawad, S. & El Atta, M. A. Impact of severity, duration, and  
435 etiology of hyperthyroidism on bone turnover markers and bone mineral density in men. *BMC  
436 endocrine disorders* **11**, 15, doi:10.1186/1472-6823-11-15 (2011).
- 437 38 Wang, B. *et al.* Perfluoroalkyl substances and endometriosis-related infertility in Chinese  
438 women. *Environment international* **102**, 207-212, doi:10.1016/j.envint.2017.03.003 (2017).
- 439 39 Taylor, K. W., Hoffman, K., Thayer, K. A. & Daniels, J. L. Polyfluoroalkyl chemicals and  
440 menopause among women 20-65 years of age (NHANES). *Environmental health perspectives*  
441 **122**, 145-150, doi:10.1289/ehp.1306707 (2014).
- 442

443 **Table 1.** NHANES characteristics for the overall adult population, men over 50 years old, and  
 444 postmenopausal women\*

| Characteristics                                                                 | Overall adult population             | Men over 50 years old                | Postmenopausal women                 |
|---------------------------------------------------------------------------------|--------------------------------------|--------------------------------------|--------------------------------------|
|                                                                                 | n=499<br>N = 64,978,899<br>Mean ± SE | n=115<br>N = 11,904,882<br>Mean ± SE | n=117<br>N = 14,570,823<br>Mean ± SE |
| Spine bone density (g/cm <sup>2</sup> )                                         | 1.012 ± 0.009                        | 1.047 ± 0.018                        | 0.945 ± 0.019                        |
| Femur bone density (g/cm <sup>2</sup> )                                         | 0.945 ± 0.007                        | 0.989 ± 0.142                        | 0.868 ± 0.013                        |
| Femur neck density (g/cm <sup>2</sup> )                                         | 0.780 ± 0.007                        | 0.794 ± 0.015                        | 0.712 ± 0.013                        |
| Poverty-income ratio                                                            | 2.882 ± 0.090                        | 2.893 ± 0.217                        | 2.753 ± 0.178                        |
| Age (years)                                                                     | 54.732 ± 0.632                       | 62.656 ± 1.022                       | 59.410 ± 1.218                       |
| Sex: N (%)                                                                      |                                      |                                      |                                      |
| Male                                                                            | 24,756,638 (38%)                     | 11,904,882 (100%)                    | 0 (0%)                               |
| Female                                                                          | 40,222,261 (62%)                     | 0 (0%)                               | 14,570,823 (100%)                    |
| Race: N (%)                                                                     |                                      |                                      |                                      |
| Mexican American                                                                | 8,171,809 (12%)                      | 1,470,648 (12%)                      | 2,015,869 (14%)                      |
| Other Hispanic                                                                  | 5,506,180 (9%)                       | 502,741 (4%)                         | 1,058,314 (7%)                       |
| Non-Hispanic White                                                              | 31,720,096 (49%)                     | 6,007,804 (51%)                      | 7,206,459 (49%)                      |
| Non-Hispanic Black                                                              | 11,388,109 (17%)                     | 2,721,619 (23%)                      | 2,718,160 (19%)                      |
| Other                                                                           | 8,192,706 (13%)                      | 1,202,068 (10%)                      | 1,572,021 (11%)                      |
| Smoking status: N (%)                                                           |                                      |                                      |                                      |
| Ever                                                                            | 25,731,955 (40%)                     | 6,396,599 (54%)                      | 4,316,813 (30%)                      |
| Never                                                                           | 39,246,944 (60%)                     | 5,508,283 (46%)                      | 10,254,011 (70%)                     |
| Physical activity: N (%)                                                        |                                      |                                      |                                      |
| Vigorous                                                                        | 21,844,374 (34%)                     | 4,434,527 (37%)                      | 2,907,339 (20%)                      |
| Not vigorous                                                                    | 43,134,525 (66%)                     | 7,470,355 (63%)                      | 11,663,484 (80%)                     |
| PFAS (ug/L): 50 <sup>th</sup> (25 <sup>th</sup> , 75 <sup>th</sup> ) percentile |                                      |                                      |                                      |
| NPFOA                                                                           | 2.00 (1.30, 3.10)                    | 2.60 (1.90, 3.70)                    | 1.83 (1.20, 3.00)                    |
| NPFOS                                                                           | 4.10 (2.50, 7.40)                    | 6.21 (3.50, 9.98)                    | 4.10 (2.70, 7.60)                    |
| MPFOS                                                                           | 1.80 (0.90, 3.00)                    | 3.24 (2.10, 4.30)                    | 1.70 (1.07, 2.94)                    |
| MPAH                                                                            | 0.07 (0.07, 0.20)                    | 0.10 (0.07, 0.30)                    | 0.07 (0.07, 0.20)                    |
| PFDE                                                                            | 0.20 (0.10, 0.40)                    | 0.20 (0.10, 0.40)                    | 0.20 (0.10, 0.34)                    |
| PFHS                                                                            | 1.40 (0.80, 2.40)                    | 2.10 (1.60, 3.56)                    | 1.30 (0.80, 2.40)                    |
| PFNA                                                                            | 0.80 (0.50, 1.30)                    | 0.90 (0.60, 1.30)                    | 0.70 (0.50, 1.20)                    |
| PFUA                                                                            | 0.10 (0.07, 0.20)                    | 0.10 (0.07, 0.20)                    | 0.07 (0.07, 0.20)                    |

445 See Table S1 for PFAS abbreviations. \* NHANES sampling weights were applied for calculation  
 446 of demographic descriptive statistics and therefore Ns for frequencies represent the weighted  
 447 sample size.  
 448



449 **Figure 1:** Selection of the National Health and Nutrition Examination Survey (NHANES)  
450 participants. Per- and poly-fluoroalkyl substances (PFAS).

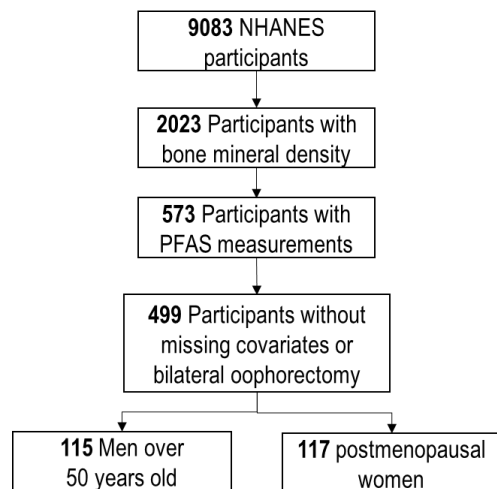

451

452 **Figure 2.** Correlation between serum perfluorinated compounds (PFAS) across the overall adult  
 453 population, in men over 50 years old, and in postmenopausal women.  
 454 Color and shape of each ellipse reflect the correlation between two compounds.

**A) Overall Population**

**B) Men over 50 years old**

**C) Post-menopausal women**

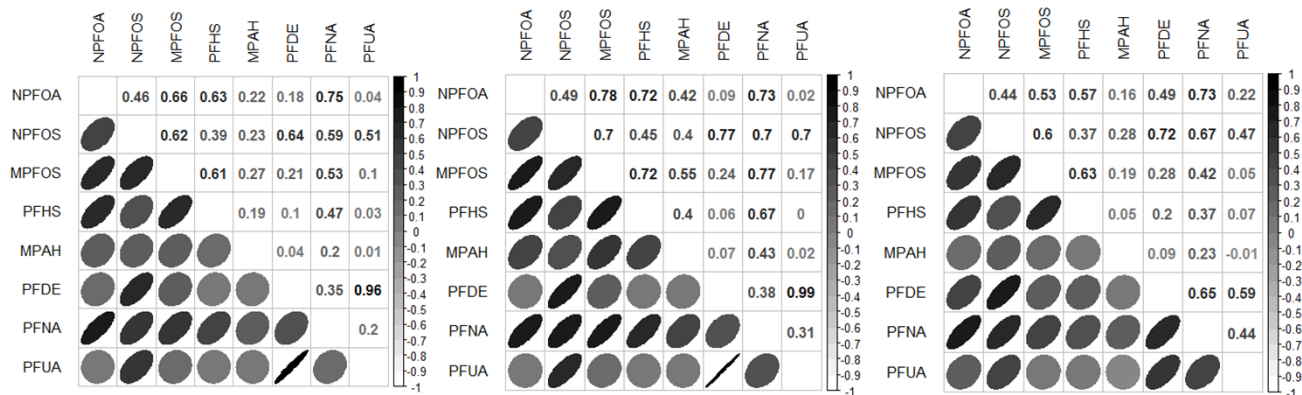

455

456

457 **Figure 3.** Estimates of the **1)** association between lumbar spine mineral density and the  
 458 perfluorinated compound (PFAS) mixture and estimates of **2)** mixture composition: weights  
 459 (percentage rescaled between 0 to 1) with 95% credible intervals for each mixture component in  
 460 A) the overall population, B) men over 50 years old, and C) postmenopausal women.  
 461 BMD = Lumbar spine bone mineral density adjusted for race/ethnicity, age, sex, physical  
 462 activity, poverty-income ratio, and smoking status.  
 463

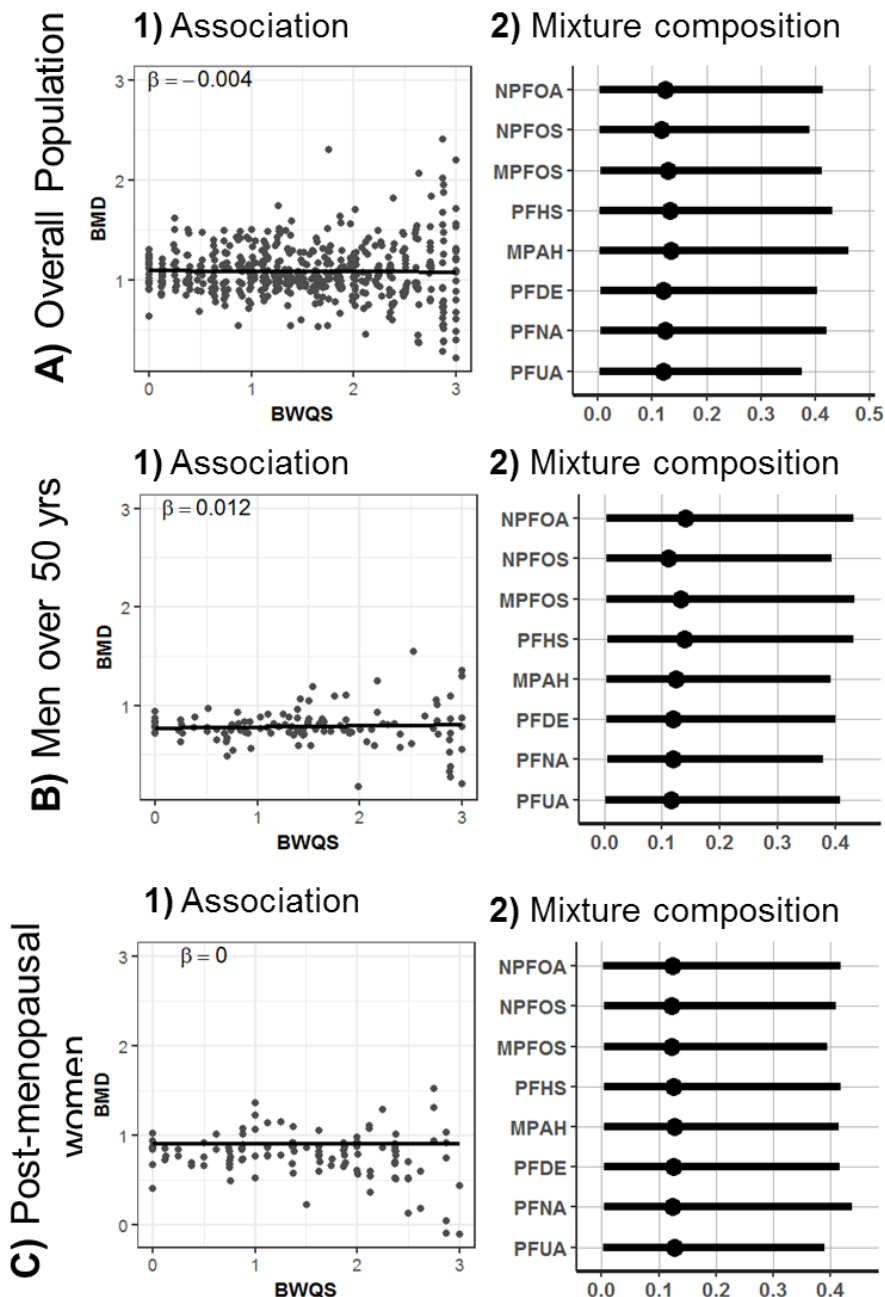

464  
 465  
 466

467 **Figure 4.** Estimates of the **1)** association between lumbar spine mineral density and the  
 468 perfluorinated compound (PFAS) mixture and estimates of **2)** mixture composition: weights  
 469 (percentage rescaled between 0 to 1) with 95% credible intervals for each mixture component in  
 470 A) the overall population, B) men over 50 years old, and C) postmenopausal women.  
 471 BMD = total femur bone mineral density adjusted for race/ethnicity, age, sex, physical activity,  
 472 poverty-income ratio, and smoking status.

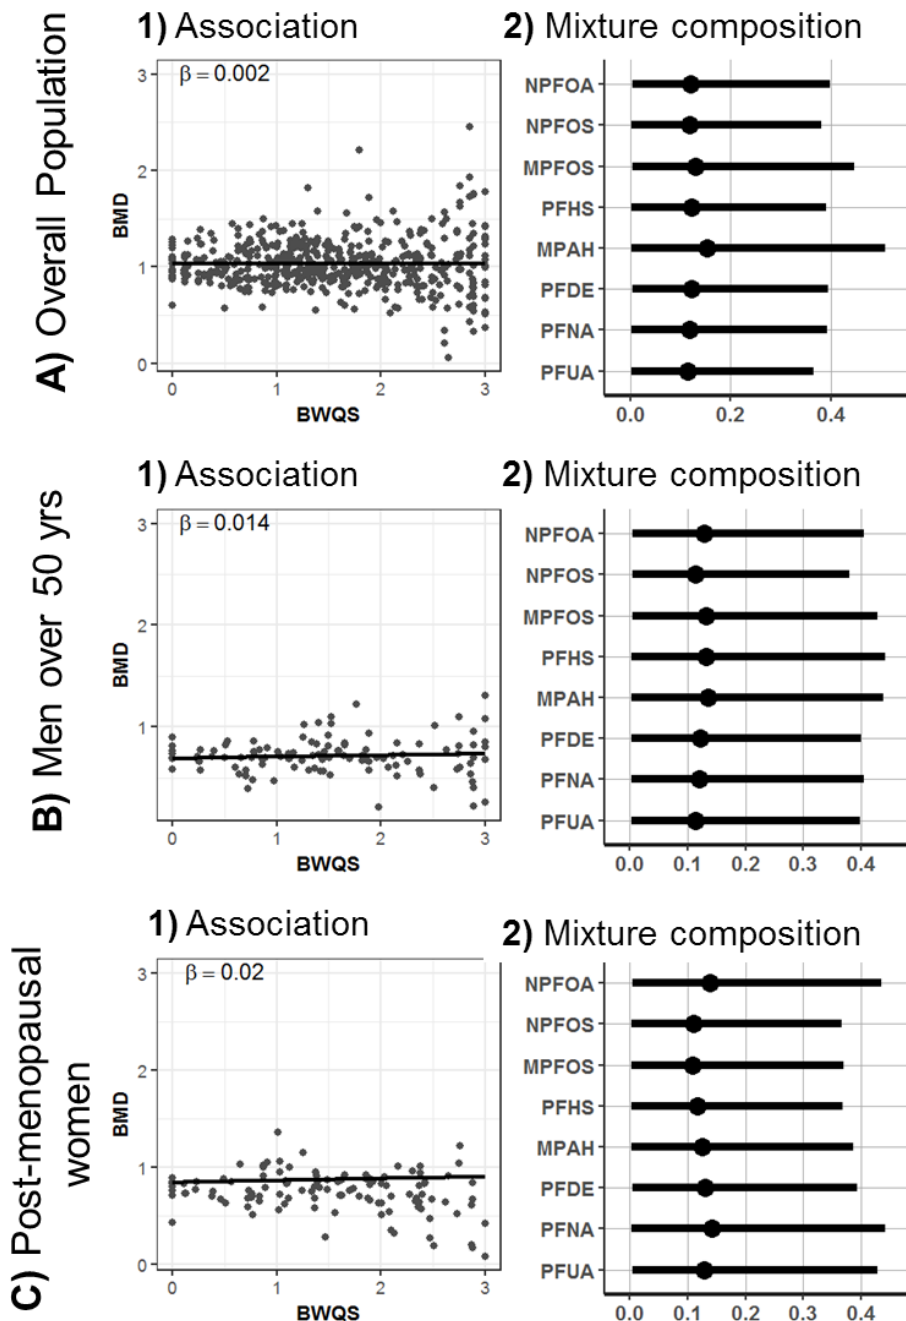

473  
 474  
 475

476 **Figure 5.** Estimates of the **1)** association between total femur mineral density and the  
 477 perfluorinated compound (PFAS) mixture and estimates of **2)** the mixture composition: weights  
 478 (percentage rescaled between 0 to 1) with 95% credible intervals for each mixture component in  
 479 A) the overall population, B) men over 50 years old, and C) postmenopausal women.  
 480 BMD = femur neck bone mineral density adjusted for race/ethnicity, age, sex, physical activity,  
 481 poverty-income ratio, and smoking status.

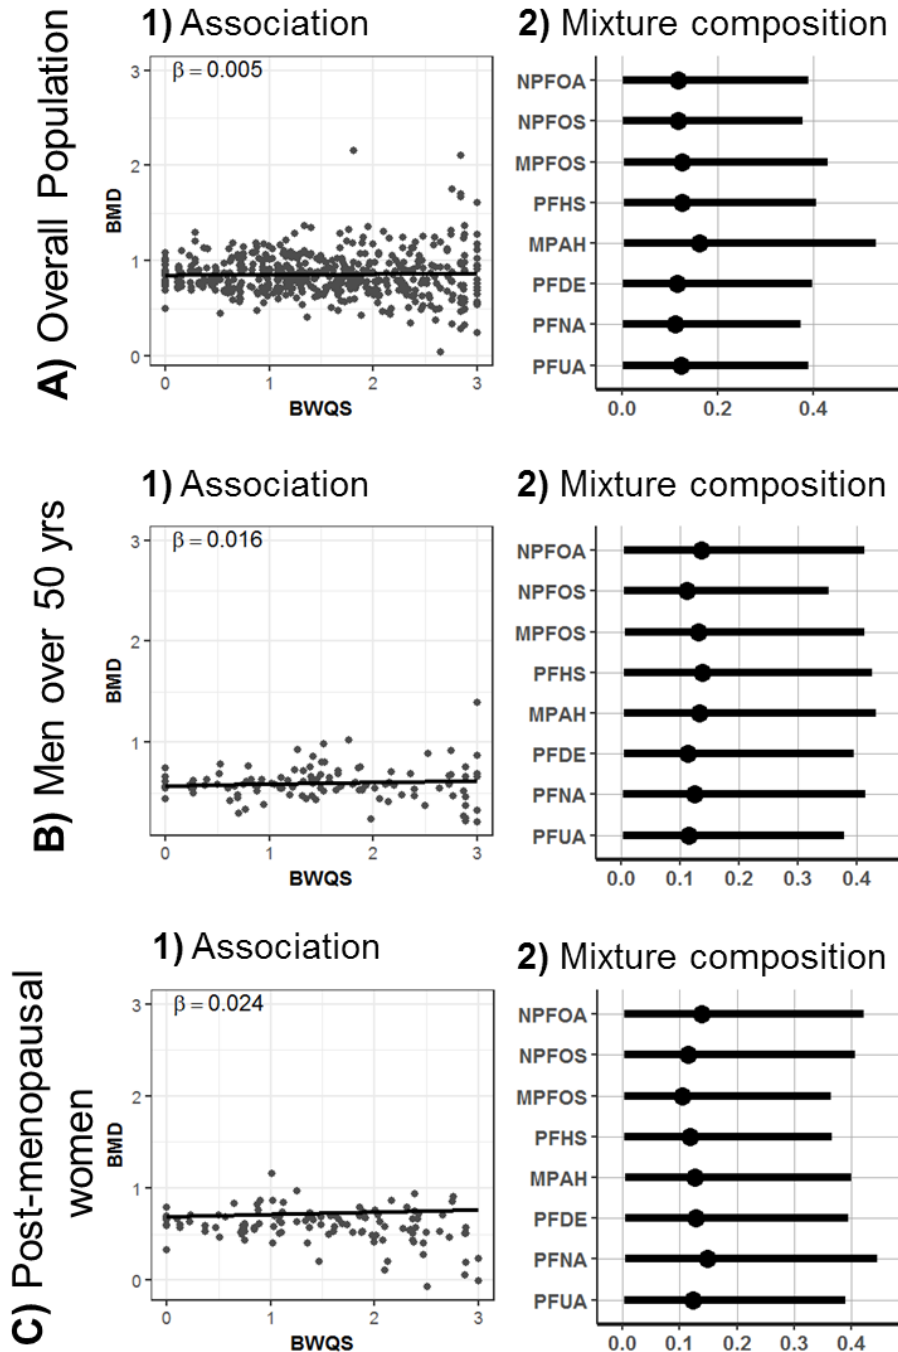

482
